# Supplementary material
Source: PubMed Central journal article supplement (PMC6011000)
Supplement: NIHMS799124-supplement-supplement_1.pdf [file NIHMS799124-supplement-supplement_1.pdf]

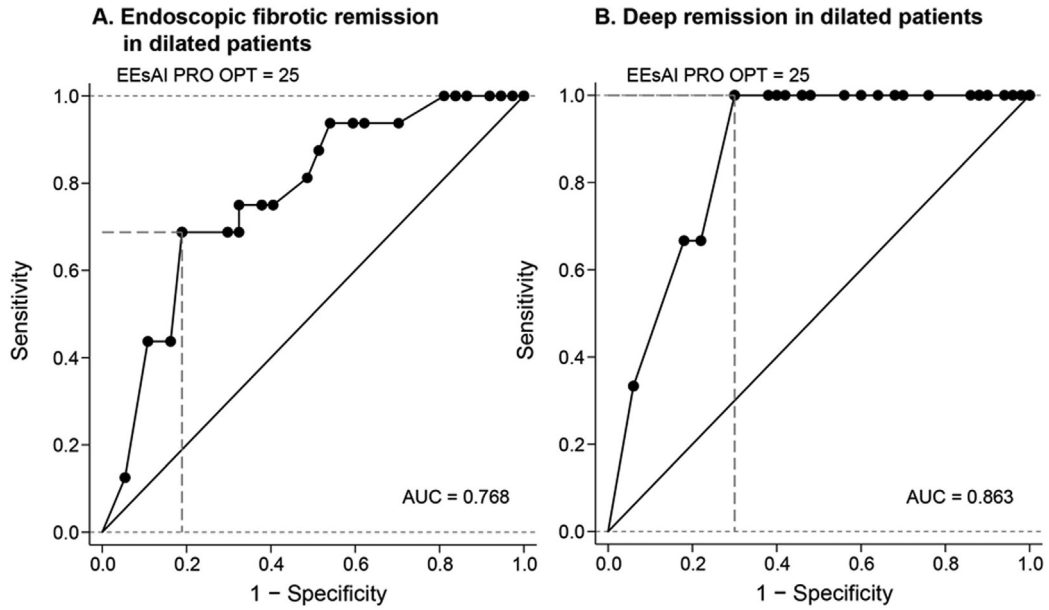

**Supplementary Figure 1.** Receiver operator curve analysis was carried out to determine the best EEsAI PRO score cutoff value to detect endoscopic fibrotic remission (A) and deep remission (B) in EoE patients that underwent esophageal dilation in the last 12 months before inclusion. The EEsAI PRO score of 25 points had an overall accuracy of 77.4% to detect patients in endoscopic fibrotic remission. The EEsAI PRO score of 25 points had an overall accuracy of 71.7% to detect patients in deep remission. Deep remission defined as combined endoscopic fibrotic and inflammatory remission as well as histologic remission (cutoff value of <20 eosinophils/mm<sup>2</sup>). OPT, optimal.

**Supplementary Table 1.** Endoscopic and Histologic Findings in Proximal and Distal Esophagus<sup>a</sup>

| Characteristic                        | Proximal |      | Distal |      | Overall |      |
|---------------------------------------|----------|------|--------|------|---------|------|
|                                       | n        | %    | n      | %    | n       | %    |
| <b>Endoscopic findings</b>            |          |      |        |      |         |      |
| Fixed rings                           |          |      |        |      |         |      |
| Absent                                | 105      | 39.0 | 81     | 30.1 | 74      | 27.5 |
| Mild                                  | 89       | 33.1 | 100    | 37.2 | 100     | 37.2 |
| Moderate                              | 59       | 21.9 | 74     | 27.5 | 78      | 29.0 |
| Severe                                | 13       | 4.8  | 13     | 4.8  | 17      | 6.3  |
| Missing                               | 3        | 1.1  | 1      | 0.4  | 0       | 0    |
| Strictures                            |          |      |        |      |         |      |
| Absent                                | 221      | 82.2 | 194    | 72.1 | 179     | 66.5 |
| Present                               | 42       | 15.6 | 74     | 27.5 | 90      | 33.5 |
| Missing                               | 6        | 2.2  | 1      | 0.4  | 0       | 0    |
| Exudates                              |          |      |        |      |         |      |
| Absent                                | 205      | 76.2 | 184    | 68.4 | 178     | 66.2 |
| Mild                                  | 49       | 18.2 | 69     | 25.7 | 75      | 27.9 |
| Severe                                | 14       | 5.2  | 14     | 5.2  | 16      | 5.9  |
| Missing                               | 1        | 0.4  | 12     | 0.7  | 0       | 0    |
| Furrows                               |          |      |        |      |         |      |
| Absent                                | 137      | 50.9 | 105    | 39.0 | 102     | 37.9 |
| Present                               | 131      | 48.7 | 163    | 60.6 | 167     | 62.1 |
| Missing                               | 1        | 0.4  | 1      | 0.4  | 0       | 0    |
| Edema                                 |          |      |        |      |         |      |
| Absent                                | 141      | 52.4 | 115    | 42.7 | 114     | 42.4 |
| Present                               | 127      | 47.2 | 153    | 56.9 | 155     | 57.6 |
| Missing                               | 1        | 0.4  | 1      | 0.4  | 0       | 0    |
| <b>Histologic findings</b>            |          |      |        |      |         |      |
| Peak eosinophil count/mm <sup>2</sup> |          |      |        |      |         |      |
| 0–16                                  | 107      | 39.8 | 80     | 29.7 | 73      | 27.1 |
| 17–64                                 | 35       | 13.0 | 40     | 14.9 | 37      | 13.8 |
| 65–320                                | 78       | 29.0 | 110    | 40.9 | 108     | 40.1 |
| >320                                  | 32       | 11.9 | 38     | 14.1 | 51      | 19.0 |
| Missing                               | 17       | 6.3  | 1      | 0.4  | 0       | 0    |
| Abscesses                             |          |      |        |      |         |      |
| Absent                                | 226      | 84.0 | 225    | 83.6 | 216     | 80.3 |
| Present                               | 38       | 14.1 | 42     | 15.6 | 53      | 19.7 |
| Missing                               | 5        | 1.9  | 2      | 0.7  | 0       | 0    |
| Basal layer enlargement               |          |      |        |      |         |      |
| <14%                                  | 101      | 37.5 | 82     | 30.5 | 79      | 29.4 |
| 14–33%                                | 93       | 34.6 | 94     | 34.9 | 96      | 35.7 |
| 34–66%                                | 50       | 18.6 | 62     | 23.0 | 66      | 24.5 |
| >67%                                  | 14       | 5.2  | 23     | 8.6  | 25      | 9.3  |
| Cannot be evaluated                   | 7        | 2.6  | 7      | 2.6  | 3       | 1.1  |
| Missing                               | 4        | 1.5  | 1      | 0.4  | 0       | 0    |
| Lamina propria                        |          |      |        |      |         |      |
| Absent                                | 131      | 48.7 | 108    | 40.1 | 96      | 35.7 |
| Present, can be evaluated             | 128      | 47.6 | 152    | 56.5 | 164     | 61.0 |
| Present, cannot be evaluated          | 6        | 2.2  | 8      | 3.0  | 9       | 3.3  |
| Missing                               | 4        | 1.5  | 1      | 0.4  | 0       | 0    |
| Lamina propria fibrosis <sup>b</sup>  |          |      |        |      |         |      |
| Absent                                | 16       | 12.5 | 9      | 5.9  | 11      | 6.7  |
| Mild/moderate                         | 78       | 60.9 | 115    | 75.2 | 110     | 66.7 |
| Severe                                | 34       | 26.6 | 29     | 19.0 | 44      | 26.7 |

<sup>a</sup>These findings were also summarized for esophagus overall.

<sup>b</sup>Severity of fibrosis is given for those patients, in whose biopsies lamina propria was present and could be evaluated (n = 128 for proximal esophagus; n = 152 for distal esophagus; n = 164 for esophagus overall).

**Supplementary Table 2.** Endoscopic and Histologic Findings in Patients That Underwent Dilation in the 12 Months Before Enrollment and in Those That Did Not

| Characteristic                         | Dilation |      | No dilation |      |
|----------------------------------------|----------|------|-------------|------|
|                                        | n        | %    | n           | %    |
| <b>Endoscopic findings</b>             |          |      |             |      |
| Fixed rings                            |          |      |             |      |
| Absent                                 | 10       | 18.9 | 63          | 29.6 |
| Mild                                   | 14       | 26.4 | 86          | 40.4 |
| Moderate                               | 24       | 45.3 | 53          | 24.9 |
| Severe                                 | 5        | 9.4  | 11          | 5.2  |
| Strictures                             |          |      |             |      |
| Absent                                 | 25       | 47.2 | 153         | 71.8 |
| Present                                | 28       | 52.8 | 60          | 28.2 |
| Exudates                               |          |      |             |      |
| Absent                                 | 32       | 60.4 | 144         | 67.6 |
| Mild                                   | 16       | 30.2 | 59          | 27.7 |
| Severe                                 | 5        | 9.4  | 10          | 4.7  |
| Furrows                                |          |      |             |      |
| Absent                                 | 21       | 39.6 | 81          | 38.0 |
| Present                                | 32       | 60.4 | 132         | 62.0 |
| Edema                                  |          |      |             |      |
| Absent                                 | 23       | 43.4 | 90          | 42.3 |
| Present                                | 30       | 56.6 | 123         | 57.7 |
| <b>Histologic findings</b>             |          |      |             |      |
| Peak eosinophils count/mm <sup>2</sup> |          |      |             |      |
| 0–16                                   | 14       | 26.4 | 57          | 26.8 |
| 17–64                                  | 6        | 11.3 | 31          | 14.6 |
| 65–320                                 | 22       | 41.5 | 85          | 39.9 |
| >320                                   | 11       | 20.8 | 40          | 18.8 |
| Abscesses                              |          |      |             |      |
| Absent                                 | 34       | 64.2 | 179         | 84.0 |
| Present                                | 19       | 35.8 | 34          | 16.0 |
| Basal layer enlargement                |          |      |             |      |
| <14%                                   | 23       | 43.4 | 55          | 25.8 |
| 14–33%                                 | 15       | 28.3 | 80          | 37.6 |
| 34–66%                                 | 10       | 18.9 | 55          | 25.8 |
| >67%                                   | 4        | 7.5  | 21          | 9.9  |
| Cannot be evaluated                    | 1        | 1.9  | 2           | 0.9  |
| Lamina propria                         |          |      |             |      |
| Absent                                 | 17       | 32.1 | 76          | 35.7 |
| Present, can be evaluated              | 34       | 64.2 | 130         | 61.0 |
| Present, cannot be evaluated           | 2        | 3.8  | 7           | 3.3  |
| Lamina propria fibrosis <sup>a</sup>   |          |      |             |      |
| Absent                                 | 5        | 14.7 | 6           | 4.6  |
| Mild/moderate                          | 19       | 55.9 | 91          | 69.5 |
| Severe                                 | 10       | 29.4 | 34          | 26.0 |

<sup>a</sup>Severity of fibrosis is given for those patients in whose biopsies lamina propria was present and could be evaluated.

**Supplementary Table 3.** Test Characteristics of the EEsAI PRO Score in Detecting Endoscopic and/or Histologic Remission in Patients That Either Underwent Esophageal Dilation in the Last 12 Months Before Inclusion or Did Not

| Outcomes                                                              | Dilation (n = 53) |                   |                                       | No dilation (n = 213) |                   |                                       |
|-----------------------------------------------------------------------|-------------------|-------------------|---------------------------------------|-----------------------|-------------------|---------------------------------------|
|                                                                       | AUC               | Optimal PRO value | Sensitivity, specificity, accuracy, % | AUC                   | Optimal PRO value | Sensitivity, specificity, accuracy, % |
| Endoscopic inflammatory remission                                     | 0.603             | 30                | 58.3, 72.4, 66.0                      | 0.631                 | 21                | 55.4, 65.3, 61.0                      |
| Endoscopic fibrotic remission                                         | 0.768             | 25                | 68.8, 81.1, 77.4                      | 0.631                 | 21                | 48.9, 64.6, 54.9                      |
| Total endoscopic remission (inflammatory and fibrotic)                | 0.814             | 27                | 83.3, 80.5, 81.1                      | 0.638                 | 19                | 56.7, 65.8, 62.9                      |
| Histologic remission (cut-off value <20 eosinophils/mm <sup>2</sup> ) | 0.524             | 30                | 46.2, 60, 56.6                        | 0.630                 | 19                | 60.0, 66.0, 64.3                      |
| Histologic remission (cut-off value <60 eosinophils/mm <sup>2</sup> ) | 0.522             | 30                | 52.6, 64.7, 60.4                      | 0.627                 | 19                | 57.0, 67.9, 63.8                      |
| Deep (total endoscopic and histologic) remission <sup>a</sup>         | 0.863             | 25                | 100, 70, 71.7                         | 0.646                 | 15                | 60.5, 64.6, 63.8                      |

<sup>a</sup>Deep remission was defined as endoscopic inflammatory and fibrotic remission as well as histologic remission (cutoff value of <20 eosinophils/mm<sup>2</sup> of hpf).
